# Supplementary material
Source: PubMed Central journal article supplement (PMC2804439)
Supplement: NIHMS104328-supplement-3.pdf [file NIHMS104328-supplement-3.pdf]

**Table 2. List of genes expressed in the HP during the first 5d of development.**

| <b>Gene</b>                                                                       | <b>NCBI accession#</b> | <b>expression in HP (1)</b> | <b>library</b> |
|-----------------------------------------------------------------------------------|------------------------|-----------------------------|----------------|
| <b>known genes</b>                                                                |                        |                             |                |
| <i>cellular retinoic acid binding protein 1a</i>                                  | <u>NM 182858</u>       | neuro                       | pituitary      |
| <i>follicle stimulating hormone beta-subunit</i>                                  | <u>NM 205624</u>       | adeno                       | pituitary      |
| <i>glycoprotein hormones, alpha polypeptide</i>                                   | <u>NM 205687</u>       | adeno                       | pituitary      |
| <i>growth hormone</i>                                                             | <u>AJ937858</u>        | adeno                       | pituitary      |
| <i>hydroxy-delta-5-steroid dehydrogenase, 3 beta- and steroid delta-isomerase</i> | <u>NM-199809</u>       | adeno                       | pituitary      |
| <i>lutinizing hormone beta-subunit</i>                                            | <u>AY714132</u>        | adeno                       | pituitary      |
| <i>POU domain, class 1, transcription factor 1</i>                                | <u>NM 212851</u>       | adeno                       | pituitary      |
| <i>prolactin</i>                                                                  | <u>NM 181437</u>       | adeno                       | pituitary      |
| <i>proopiomelanocortin</i>                                                        | <u>NM 181438</u>       | adeno                       | pituitary      |
| <i>secretogranin III</i>                                                          | <u>NM 200757</u>       | adeno                       | pituitary      |
| <i>solute carrier family 16 (monocarboxylic acid transporters), member 9a</i>     | <u>NM 200410</u>       | adeno                       | pituitary      |
| <i>somatolactin beta</i>                                                          | <u>NM 001037674</u>    | adeno                       | pituitary      |
| <i>thyroid stimulating hormone, beta subunit</i>                                  | <u>NM 181494</u>       | adeno                       | pituitary      |
| <i>adenylate cyclase activating polypeptide 1b</i>                                | <u>NM 214715</u>       | hypo                        | hypothalamus   |
| <i>cytochrome P450, family 19, subfamily A, polypeptide 1b</i>                    | <u>NM 131642</u>       | hypo                        | hypothalamus   |
| <i>pro-melanin concentrating hormone-like</i>                                     | <u>FJ392645</u>        | hypo                        | hypothalamus   |
| <b>ESTs and new genes</b>                                                         |                        |                             |                |
| <i>adrenomedullin 2</i>                                                           | <u>FJ392613</u>        | adeno                       | pituitary      |
| <i>uo:ion002</i>                                                                  | <u>FJ392616</u>        | adeno                       | pituitary      |
| <i>uo:ion003</i>                                                                  | <u>FJ392618</u>        | adeno+hypo                  | pituitary      |
| <i>calcium/calmodulin-dependent protein kinase 1D</i>                             | <u>NM 001080658</u>    | hypo                        | hypothalamus   |
| <i>pleckstrin and Sec7 domain containing 3 like</i>                               | <u>FJ392621</u>        | hypo                        | hypothalamus   |
| <i>potassium channel tetramerization domain containing 4</i>                      | <u>FJ392642</u>        | hypo                        | hypothalamus   |
| <i>serpin peptidase inhibitor, clade I (neuroserpin), member 1</i>                | <u>FJ392619</u>        | hypo                        | pituitary      |
| <i>stathmin 1/oncoprotein 18 b</i>                                                | <u>FJ392638</u>        | hypo                        | hypothalamus   |

Column (1) indicates that the gene is expressed in the neurohypophysis (neuro), adenohypophysis (adeno), or hypothalamus (hypotha) during the first 5d of development.
